# Supplementary material for: Genome-Wide and 16S rRNA Sequencing-Based Analysis on the Health Effects of Lacticaseibacillus paracasei XLK401 on Chicks
Source: MDPI journal article supplement (doi:10.3390/microorganisms11092140), 2023-08-23

A

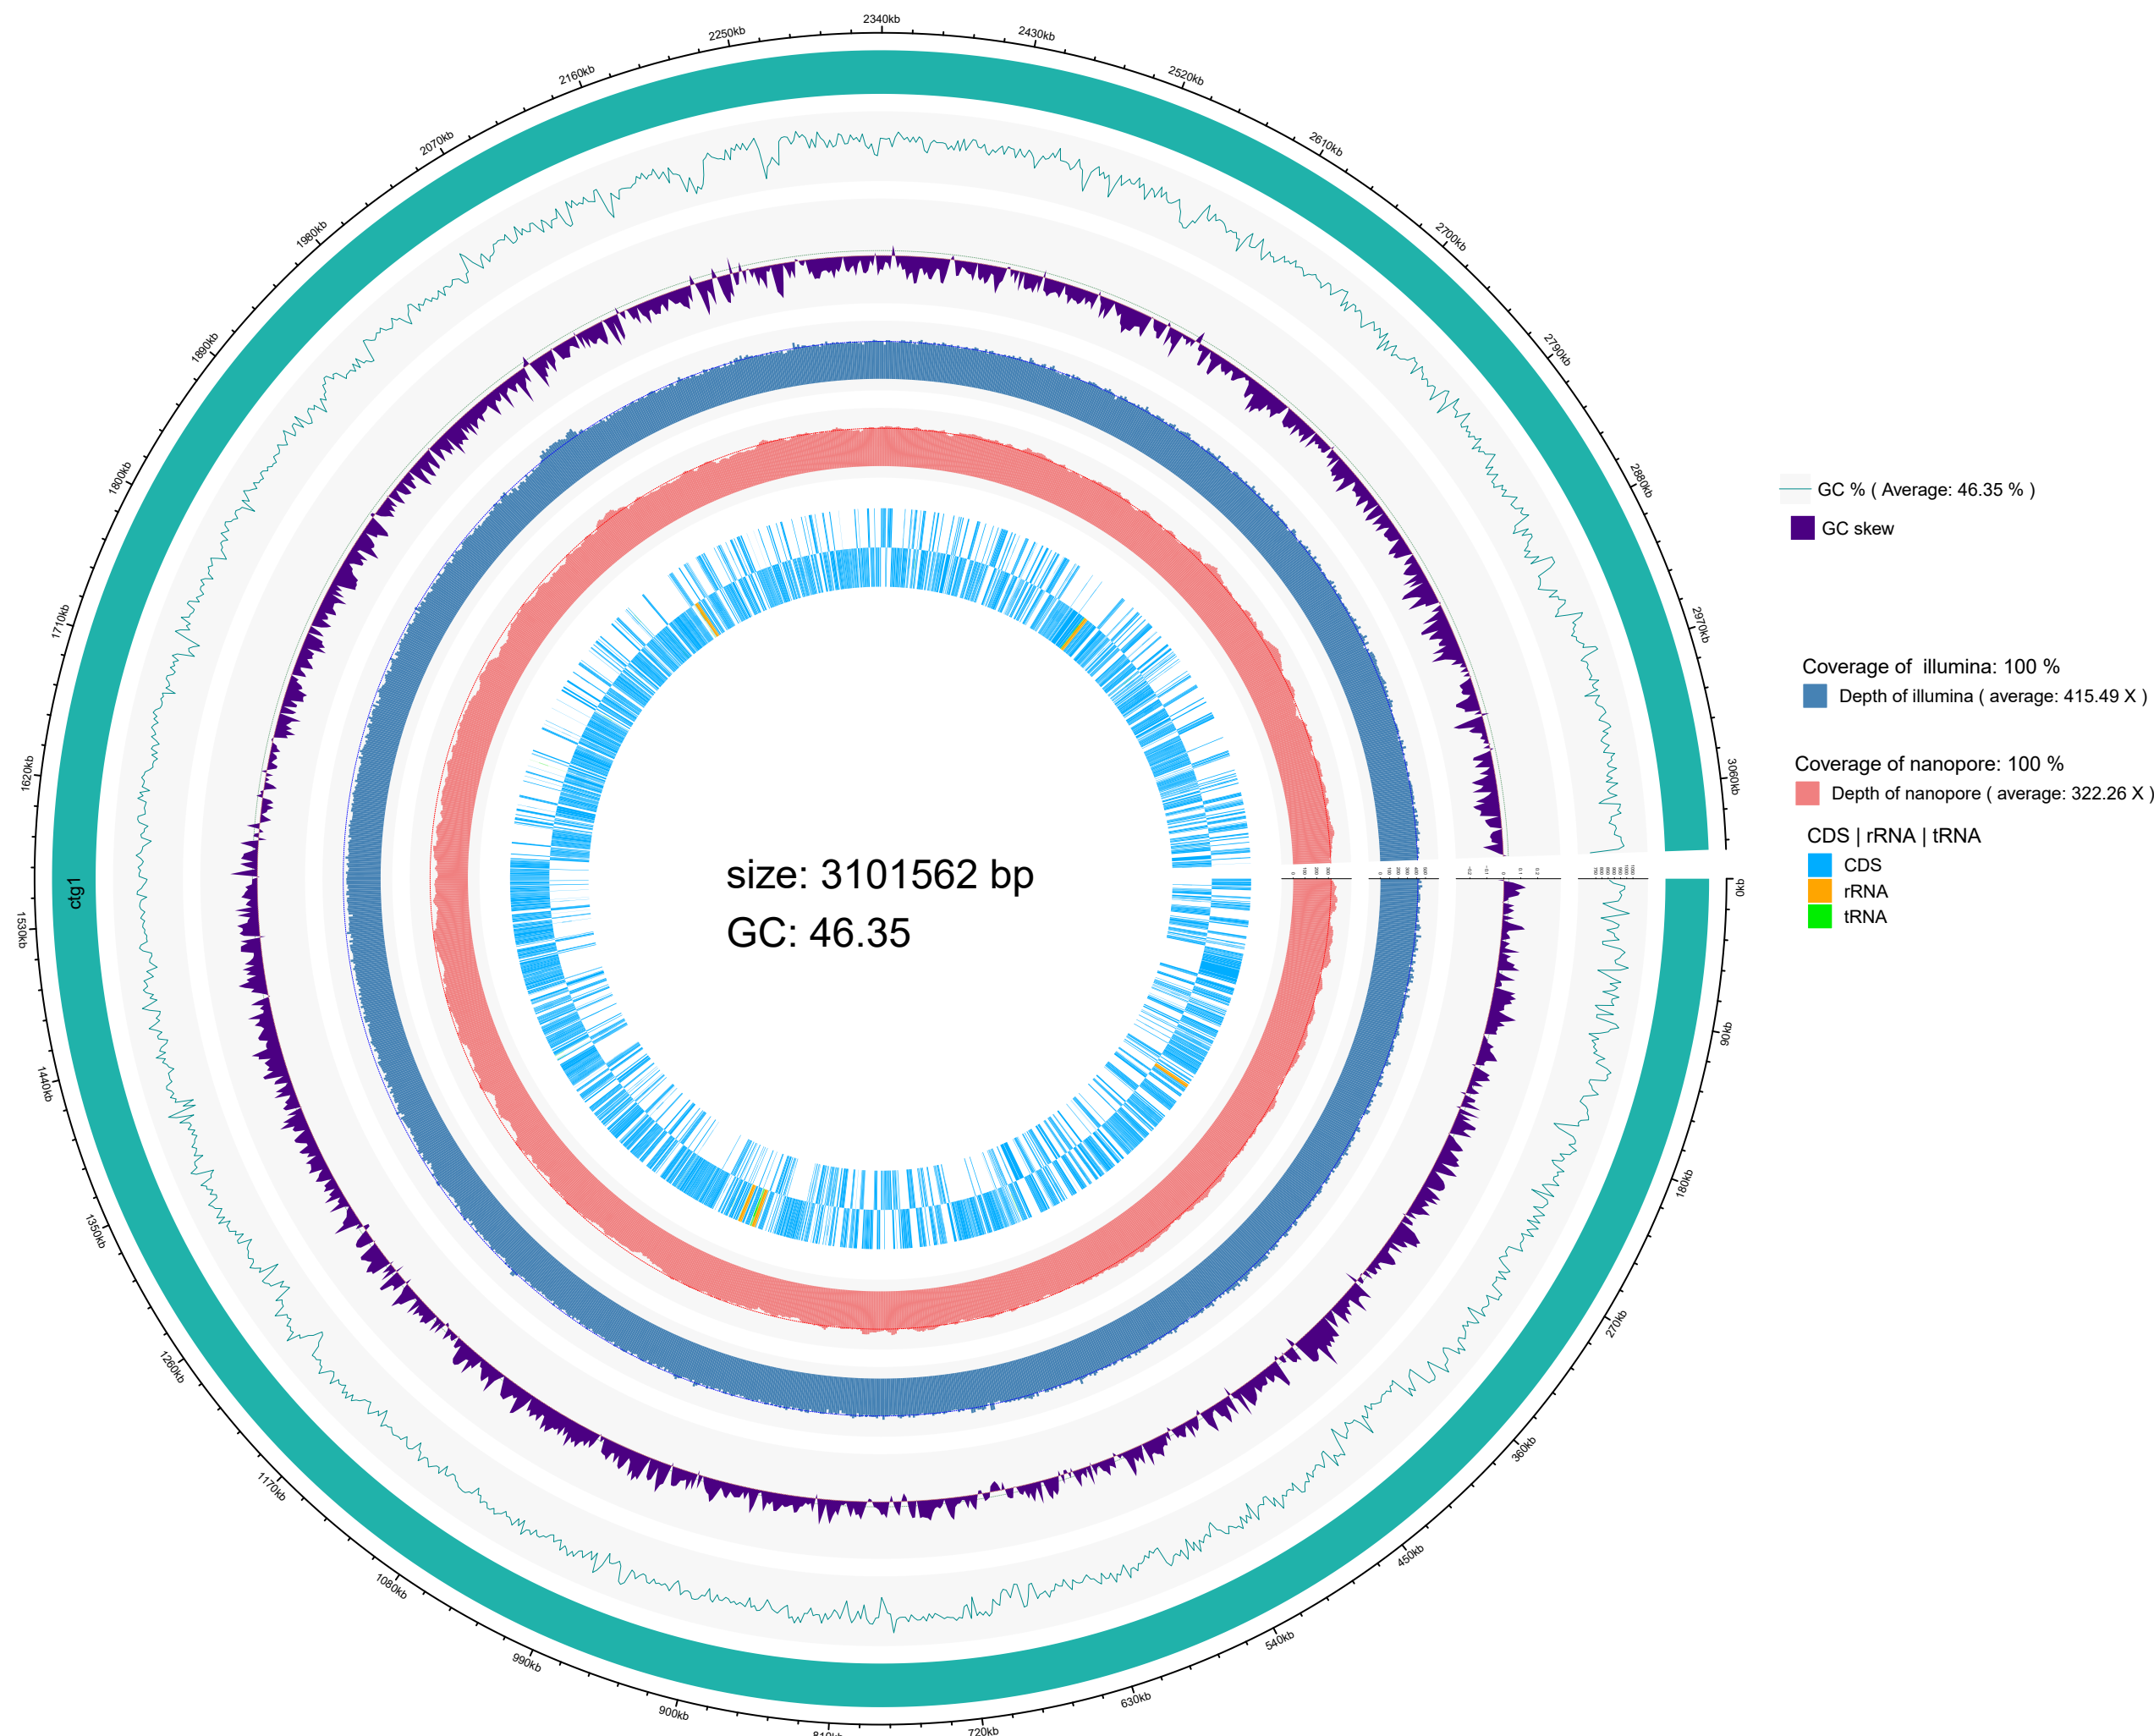

B

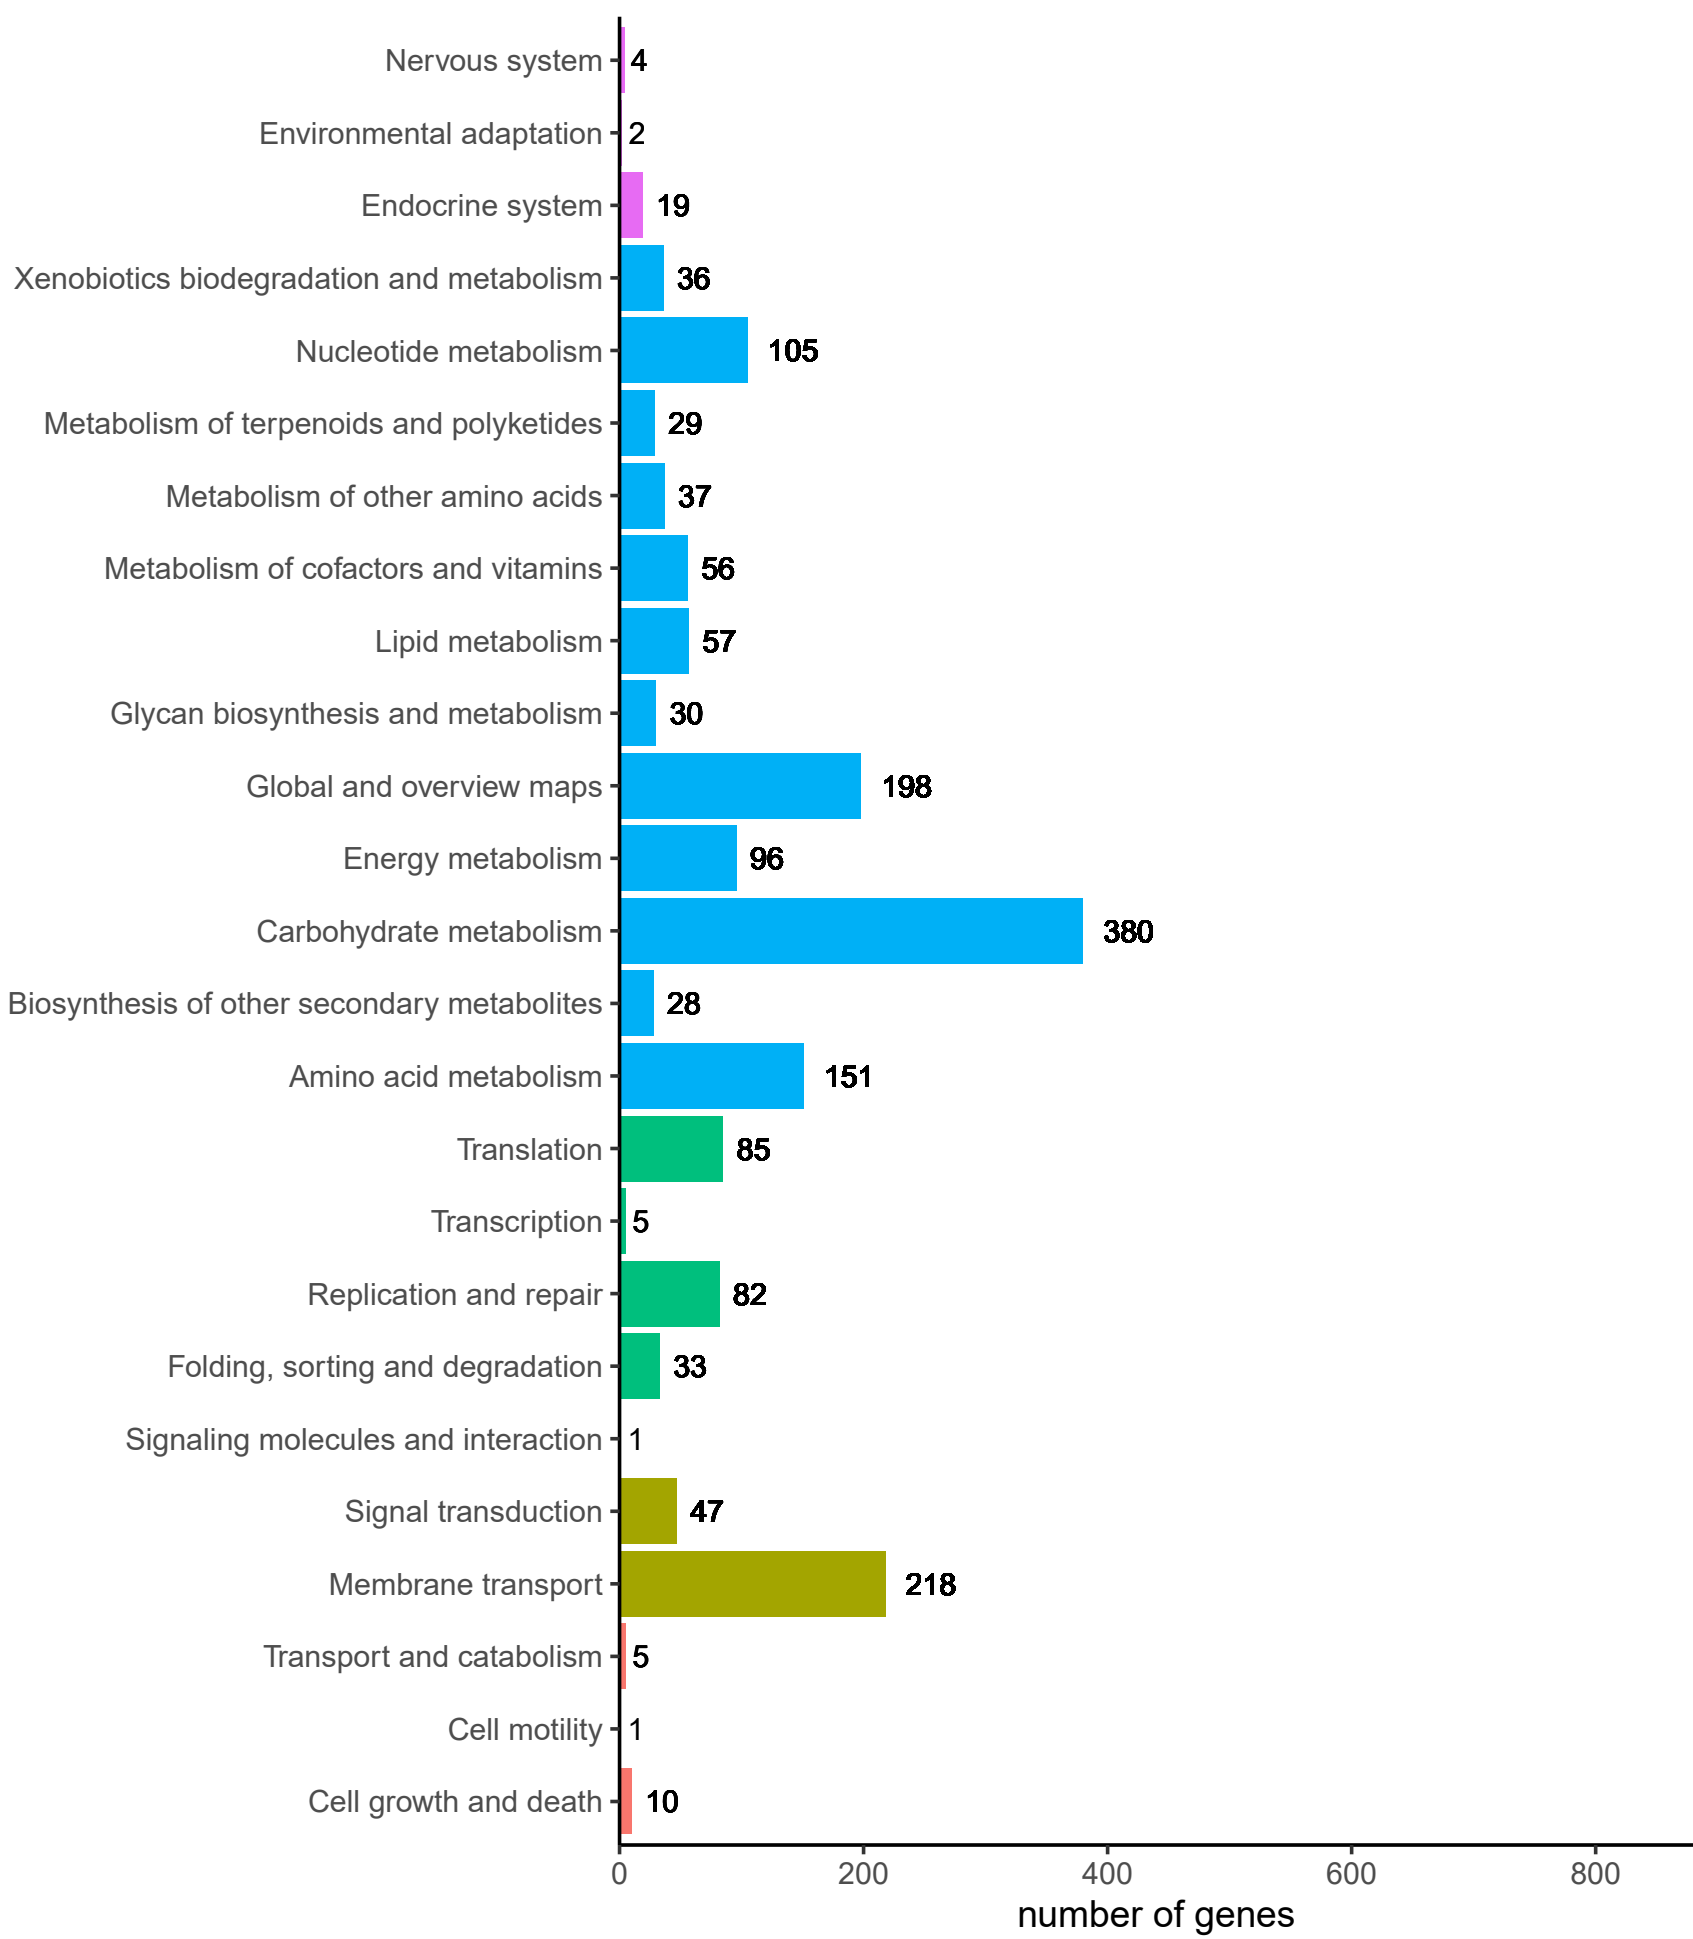

C

Class

- Cellular Processes
- Environmental Information Processing
- Genetic Information Processing
- Metabolism
- Organismal Systems

Group

- C|Energy production and conversion
- D|Cell cycle control, cell division, chromosome partitioning
- E|Amino acid transport and metabolism
- F|Nucleotide transport and metabolism
- G|Carbohydrate transport and metabolism
- H|Coenzyme transport and metabolism
- I|Lipid transport and metabolism
- J|Translation, ribosomal structure and biogenesis
- K|Transcription
- L|Replication, recombination and repair
- M|Cell wall/membrane/envelope biogenesis
- N|Cell motility
- O|Posttranslational modification, protein turnover, chaperones
- P|Inorganic ion transport and metabolism
- Q|Secondary metabolites biosynthesis, transport and catabolism
- R|General function prediction only
- S|Function unknown
- T|Signal transduction mechanisms
- U|Intracellular trafficking, secretion, and vesicular transport
- V|Defense mechanisms
- X|Mobilome: prophages, transposons

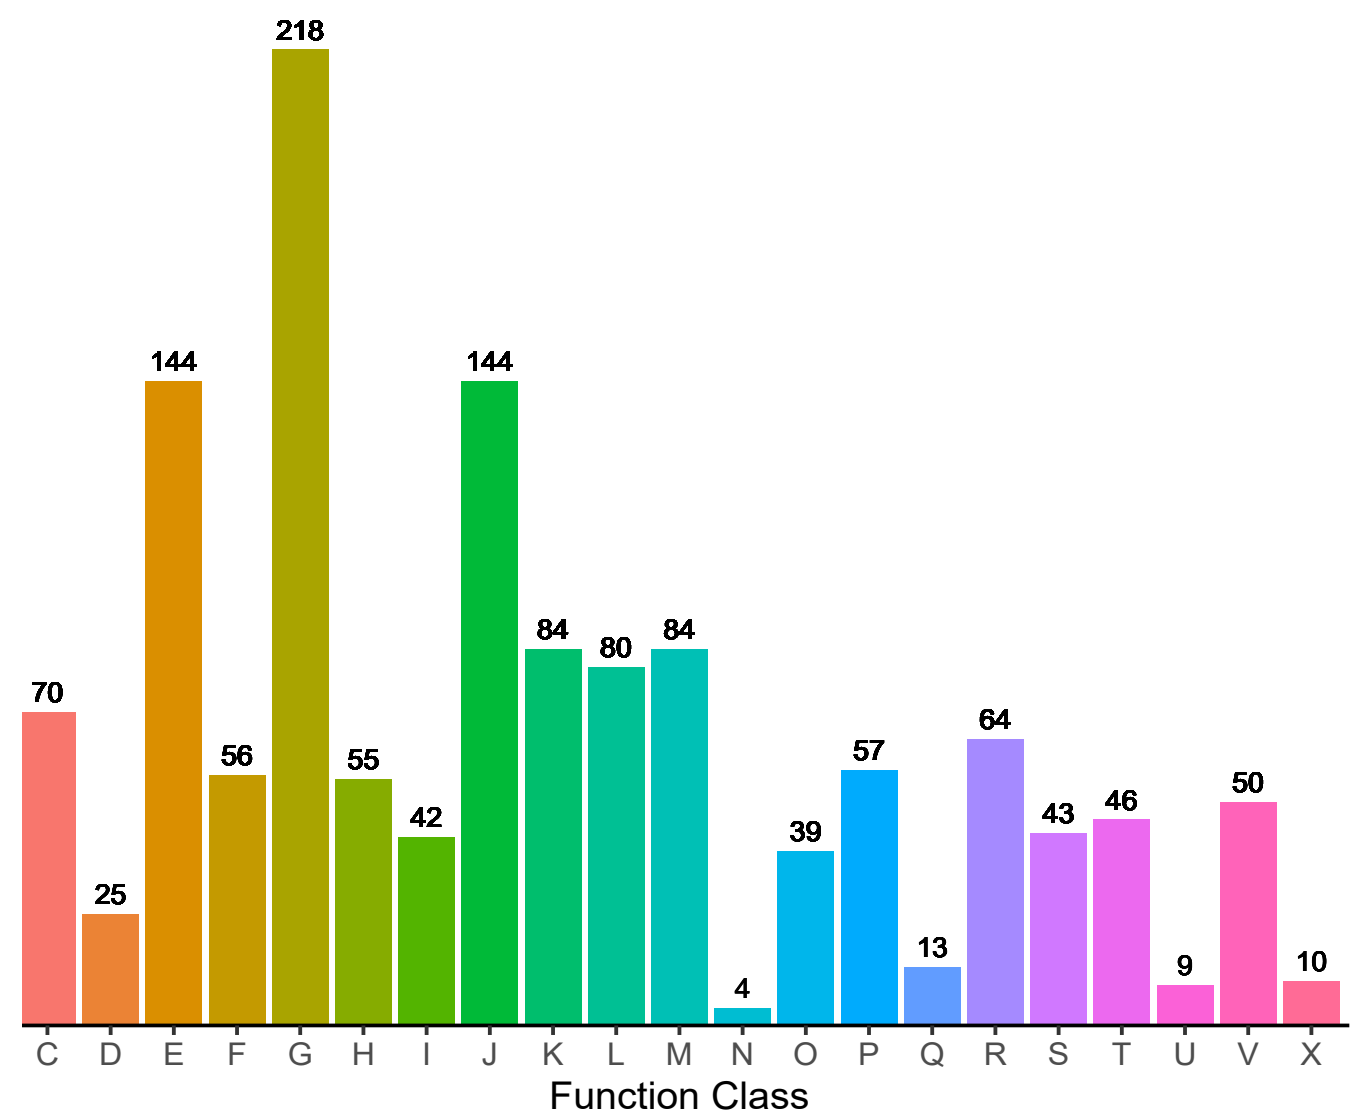

Supplement: s1 [file s1]
