# Supplementary figures and images for: Genome-Wide and 16S rRNA Sequencing-Based Analysis on the Health Effects of Lacticaseibacillus paracasei XLK401 on Chicks
Source: MDPI journal article supplement (doi:10.3390/microorganisms11092140), 2023-08-23

A

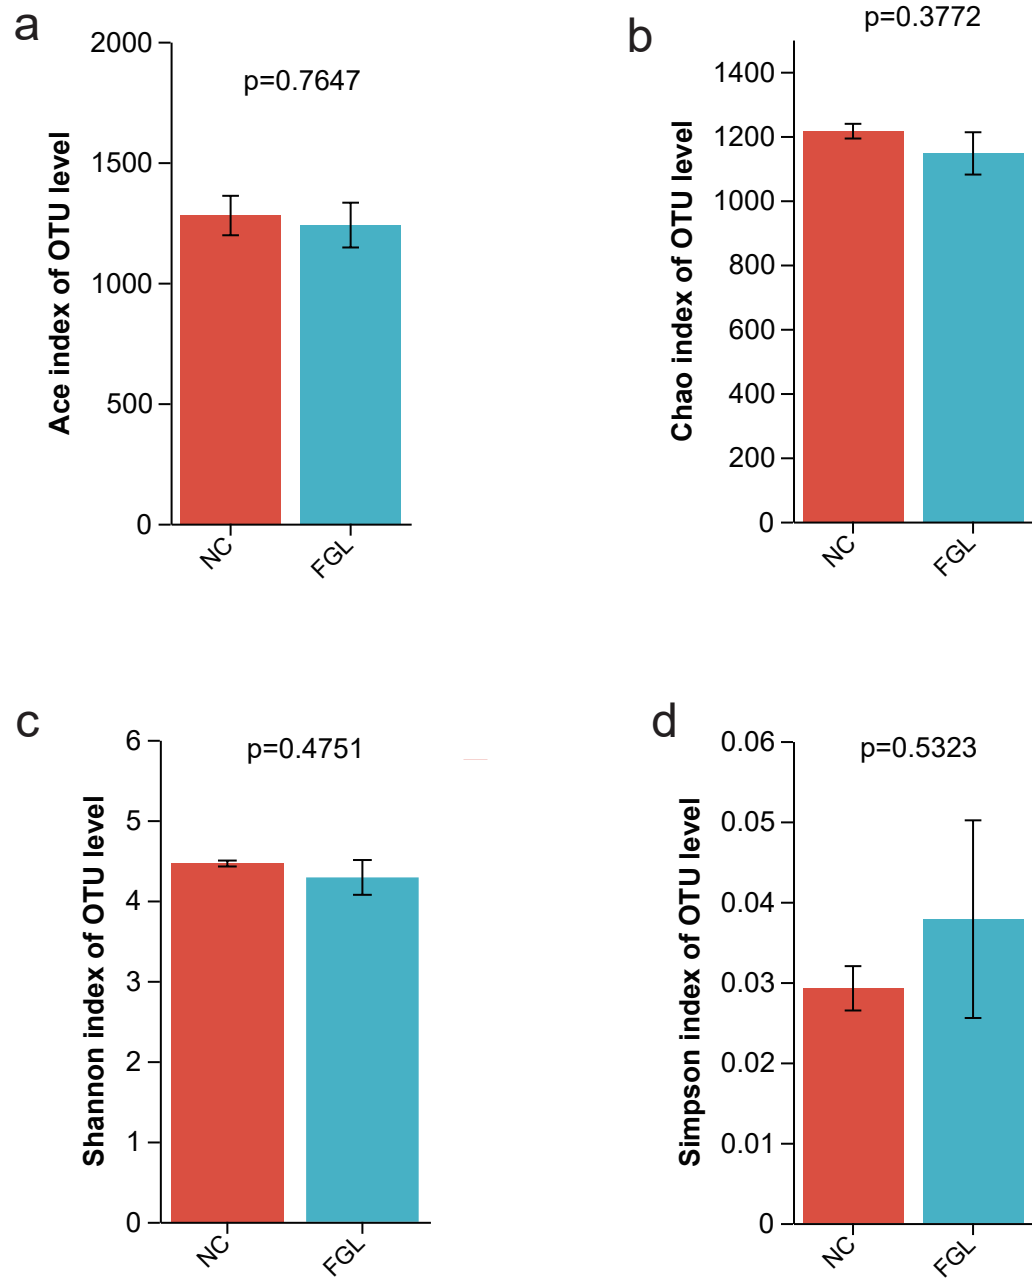

B

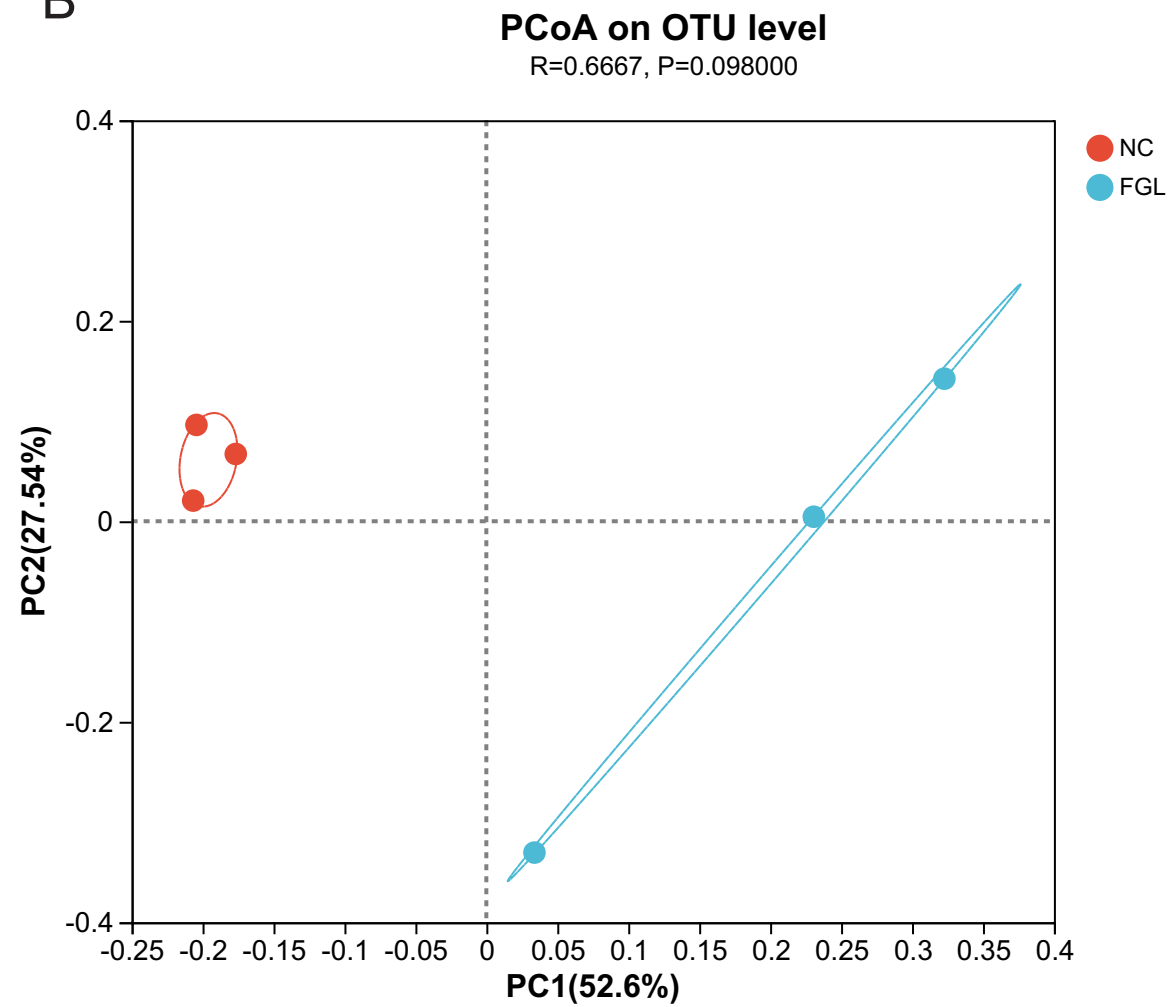

Supplement: s1 [file s1]
